# Supplementary material for: Global systematic review of Indigenous community-led legal interventions to control alcohol
Source: PubMed Central journal article supplement — BMJ Open. 2017 Mar 27;7(3):e013932. doi: 10.1136/bmjopen-2016-013932 (PMC5372059; doi:10.1136/bmjopen-2016-013932), 2017-03-27
Supplement: bmjopen-2016-013932supp.pdf [file bmjopen-2016-013932supp.pdf]

## Supplementary file – search strategy

### Search strategy:

1. (alcohol) OR (liquor)
2. (control) OR (ban) OR (prohibition) OR (tax) OR (restriction) OR (limit) OR (regulation) OR (bylaw) OR (law) OR (statute) OR (policy) OR (plan)
3. (indigenous) OR (aborigin) OR (alaska) OR (alaska native) OR (american indian) OR (autochthonous) OR (eskimo) OR (Ethnic Group) OR (first nation) OR (Greenlandic) OR (indigenous) OR (inuit) OR (Inupiat) OR (inuvaluit) OR (kalaallit) OR (maori) OR (maoris) OR (mapuche) OR (native american) OR (native people) OR (native population) OR (native siberian) OR (navaho) OR (nunangat) OR (sami) OR (skolt) OR (taiga) OR (torres strait island) OR (tribe) OR (tribal) OR (yuit) OR (yupik) OR (zuni)
4. (Communit) OR (local) OR (village) OR (town) OR (customary) OR (territory) OR (Indigenous country) OR (Aboriginal country) OR (native country)

(1 and 2 and 3 and 4)
